# Supplementary material
Source: Springer Nature journal article supplement (https://www.springermedizin.de/resource/supplementary/12885_2014_4910_MOESM3_ESM.pdf/9467706)

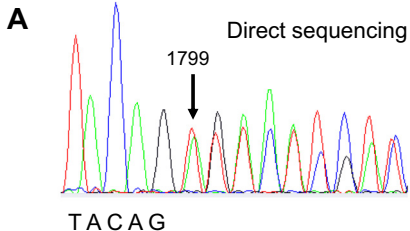

**B**

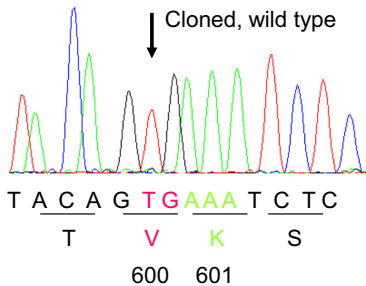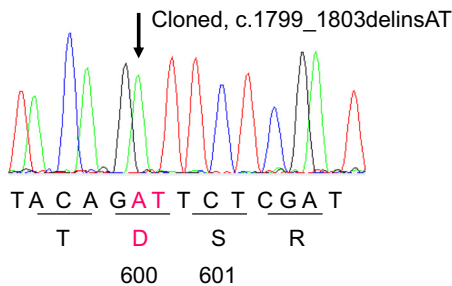

Supplement: MOESM3 [file 9467706]
